# Supplementary material
Source: publisher figshare collection journal article supplement (https://acs.figshare.com/ndownloader/files/4660783)
Supplement: Supplementary file 1 [file 4660783]

# The First Organically Templated Tetravalent Uranium Phosphates with Dimer-Structured Topologies

Yu-Lun Lai,<sup>a</sup> Ray-Kuang Chiang,<sup>b</sup> Kwang-Hwa Lii,<sup>c</sup> and Sue-Lein Wang<sup>a,\*</sup>

<sup>a</sup>Department of Chemistry, National Tsing Hua University, Hsinchu 30013, Taiwan

<sup>b</sup>Department of Chemical Engineering, Far East College, Tainan, 74448, Taiwan

<sup>c</sup>Department of Chemistry, National Central University, Chungli 32054, Taiwan

Table S1. Fluorine tests, ICP-AES and EA analyses

Figure S1. ORTEP of (C<sub>4</sub>H<sub>16</sub>N<sub>3</sub>)[U<sub>2</sub>F<sub>3</sub>(PO<sub>4</sub>)<sub>2</sub>(HPO<sub>4</sub>)] (1)

Figure S2. ORTEP of (C<sub>6</sub>H<sub>21</sub>N<sub>3</sub>)[U<sub>2</sub>F<sub>4</sub>(PO<sub>4</sub>)(HPO<sub>4</sub>)<sub>2</sub>] (2)

Figure S3. ORTEP of (C<sub>4</sub>H<sub>16</sub>N<sub>3</sub>)<sub>2</sub>[U<sub>2</sub>F<sub>10</sub>(HPO<sub>4</sub>)<sub>2</sub>] (3)

Figure S4. ORTEP of (C<sub>6</sub>H<sub>16</sub>N<sub>2</sub>)<sub>2</sub>(UF<sub>7</sub>)(H<sub>2</sub>PO<sub>4</sub>) (4)

Figure S5. Experimental (top) and simulated (bottom) X-ray powder patterns for (C<sub>4</sub>H<sub>16</sub>N<sub>3</sub>)[U<sub>2</sub>F<sub>3</sub>(PO<sub>4</sub>)<sub>2</sub>(HPO<sub>4</sub>)] (1)

Figure S6. Experimental (top) and simulated (bottom) X-ray powder patterns for (C<sub>6</sub>H<sub>21</sub>N<sub>3</sub>)[U<sub>2</sub>F<sub>4</sub>(PO<sub>4</sub>)(HPO<sub>4</sub>)<sub>2</sub>] (2)

Figure S7. Experimental (top) and simulated (bottom) X-ray powder patterns for (C<sub>6</sub>H<sub>16</sub>N<sub>2</sub>)<sub>2</sub>(UF<sub>7</sub>)(H<sub>2</sub>PO<sub>4</sub>) (4)

Figure S8. Infinite chains of U<sup>6+</sup> and U<sup>4+</sup>.

Table S1. Fluorine tests, ICP-AES and EA analyses

|                                | <b>1</b>       | <b>2</b>      | <b>3</b>      | <b>4</b>      |
|--------------------------------|----------------|---------------|---------------|---------------|
| %U found (calcd.) <sup>a</sup> | 34.43 (34.58)  | 44.15 (44.47) | 48.05 (48.17) | 51.12 (51.45) |
| %P found (calcd.) <sup>a</sup> | 4.51 (4.49)    | 5.64 (5.78)   | 9.21 (9.40)   | 9.94 (10.04)  |
| %F found (calcd.) <sup>b</sup> | 18.95 (19.32 ) | 17.46(17.75)  | 7.32(7.69)    | 5.69 (6.16)   |
| %C found (calcd.)              | 20.67(20.94)   | 8.86(8.97)    | 7.18(7.29)    | 5.03(5.19)    |
| %N found (calcd.)              | 8.01(8.14)     | 7.68(7.85)    | 5.41(5.69)    | 4.48(4.54)    |
| %H found (calcd.)              | 3.15(3.22)     | 3.11(3.20)    | 2.15(2.34)    | 1.69(1.85)    |

a. ICP-AES results

b. Fluoride test were measured by ion chromatography.

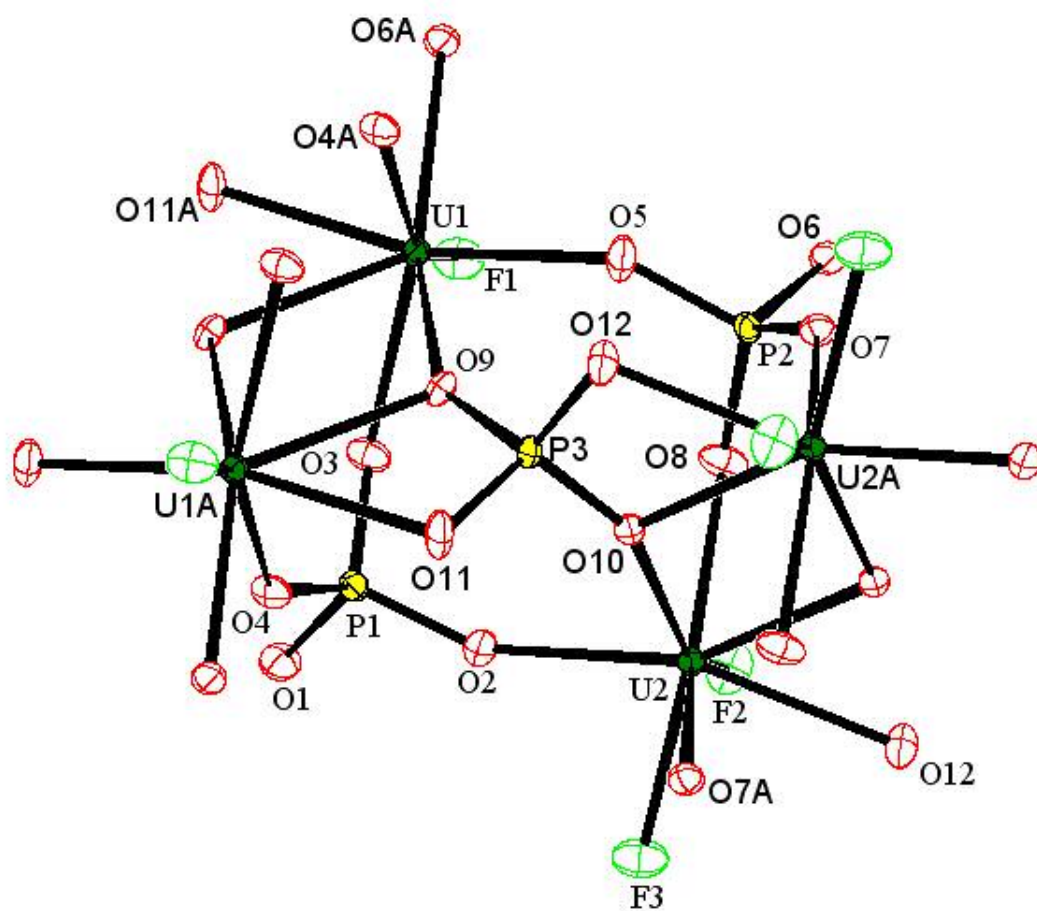

Figure S1. ORTEP of  $(\text{C}_4\text{H}_{16}\text{N}_3)[\text{U}_2\text{F}_3(\text{PO}_4)_2(\text{HPO}_4)]$  (**1**)

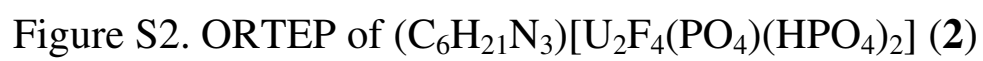

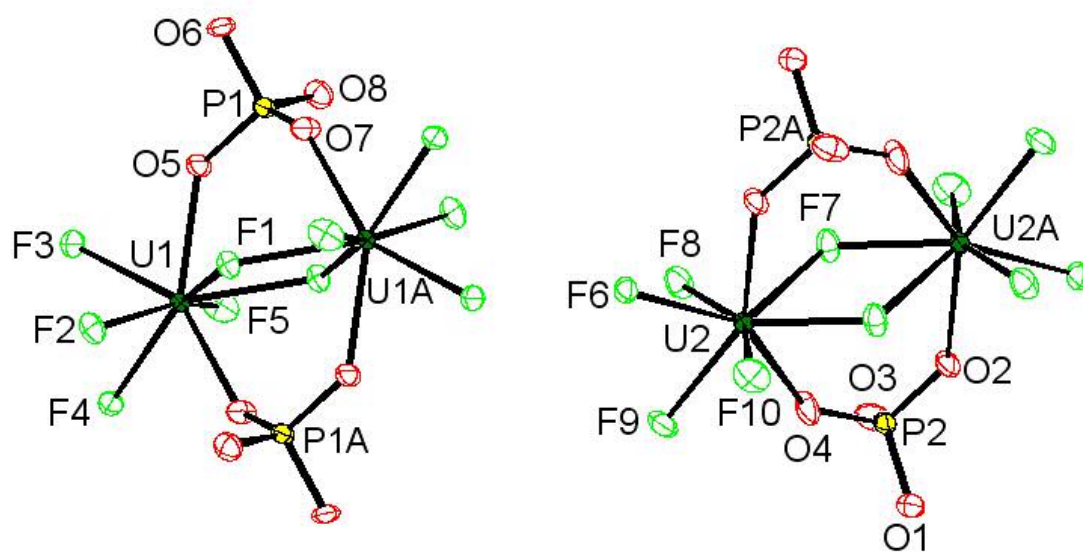

Figure S3. ORTEP of  $(C_4H_{16}N_3)_2[U_2F_{10}(HPO_4)_2]$  (**3**)

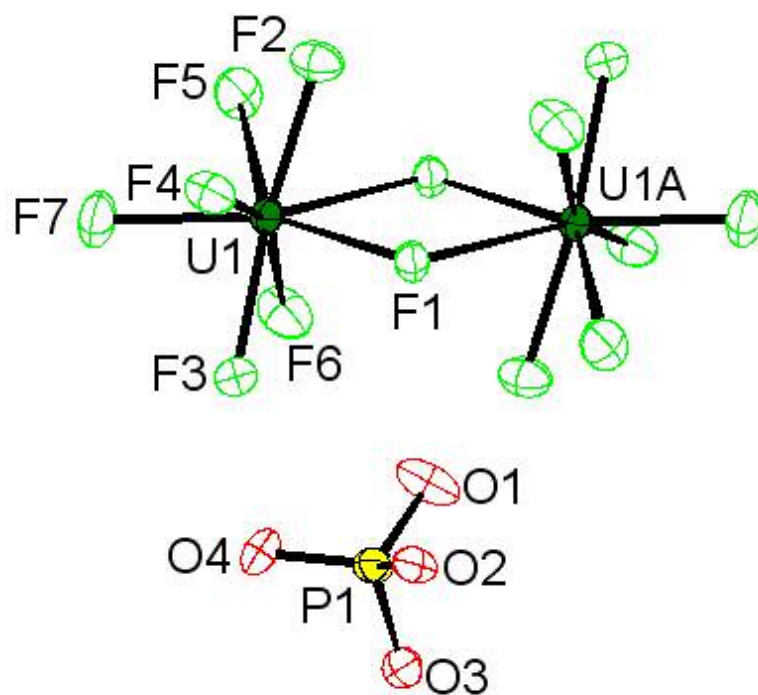

Figure S4. ORTEP of  $(\text{C}_6\text{H}_{16}\text{N}_2)_2[(\text{H}_2\text{PO}_4)\text{UF}_7]$  (**4**)

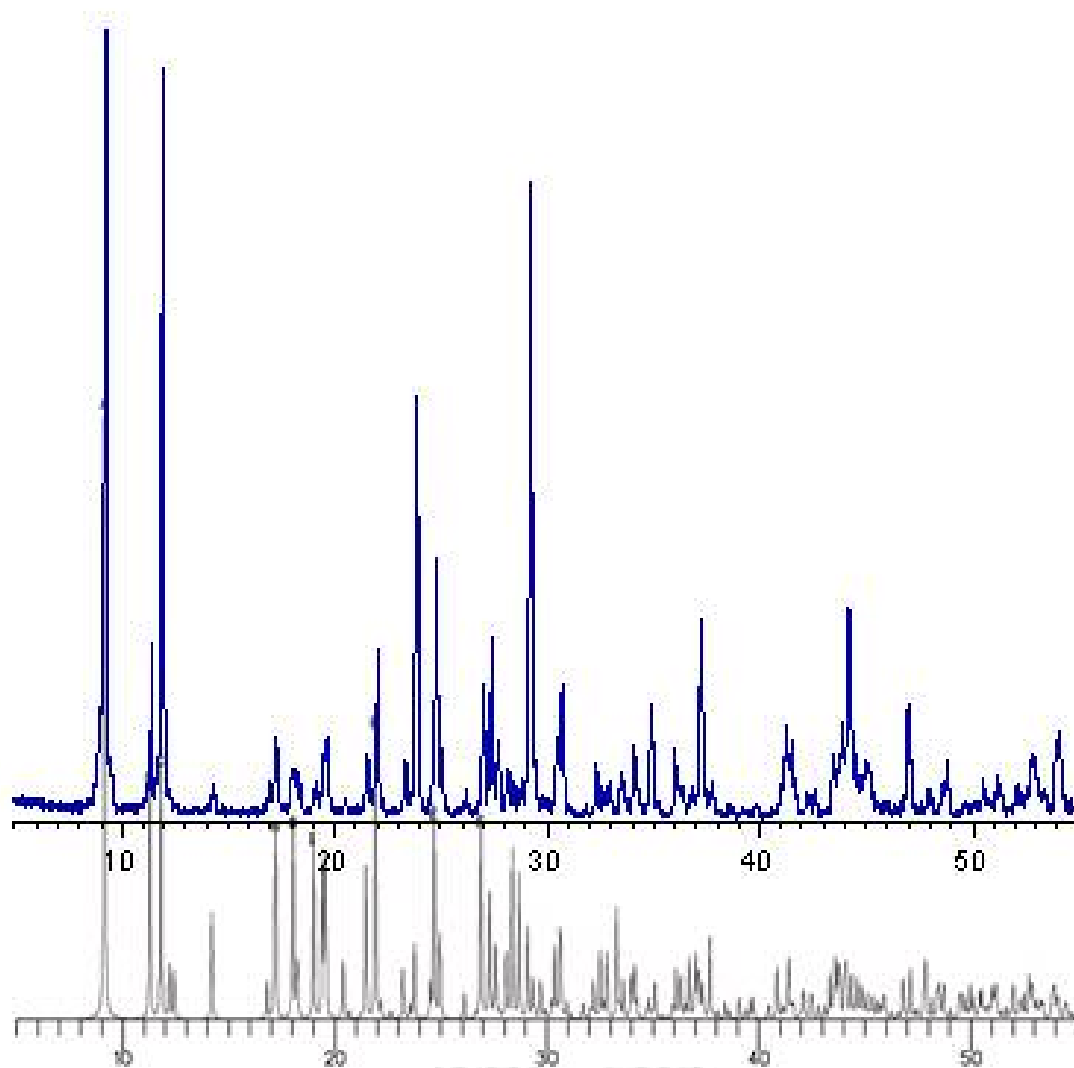

Figure S5. Experimental (top) and simulated (bottom) X-ray powder patterns for  $(\text{C}_4\text{H}_{16}\text{N}_3)[\text{U}_2\text{F}_3(\text{PO}_4)_2(\text{HPO}_4)]$  (**1**)

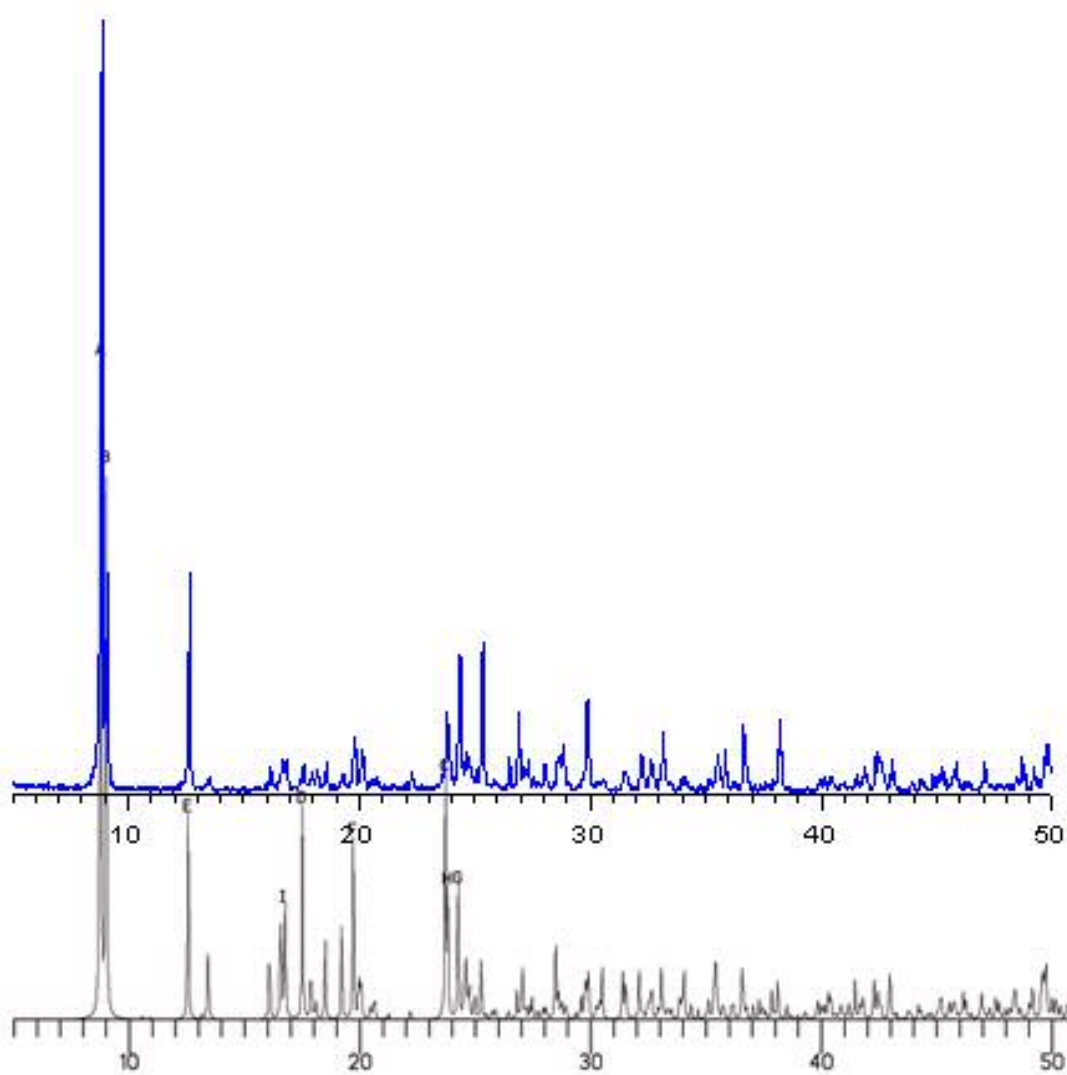

Figure S6. Experimental (top) and simulated (bottom) X-ray powder patterns for  $(\text{C}_6\text{H}_{21}\text{N}_3)[\text{U}_2\text{F}_4(\text{PO}_4)(\text{HPO}_4)_2]$  (**2**)



Figure S7. Experimental (top) and simulated (bottom) X-ray powder patterns for  $(\text{C}_6\text{H}_{16}\text{N}_2)_2[(\text{H}_2\text{PO}_4)\text{UF}_7]$  (**4**)

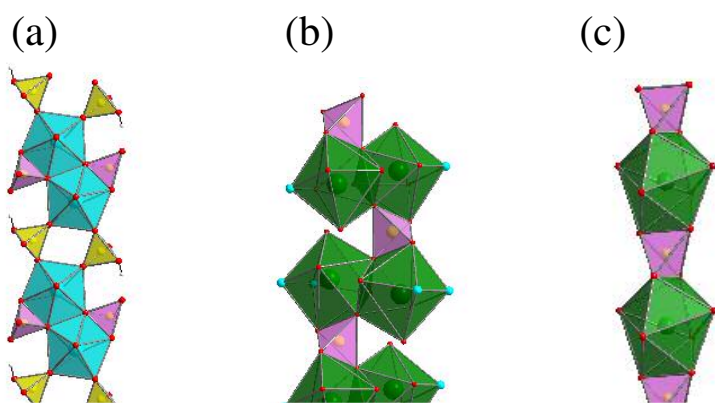

Figure S8. (a) 1D chain structure of  $\text{U}^{6+}$   $((\text{H}_3\text{A})[\text{UO}_2(\text{PO}_4)(\text{HPO}_4)])$  with  $\text{A} = \text{dien}$  or  $\text{tren}$ ) prepared from the same reactions as **1** and **2** by increasing the concentration of amine templates; (b) and (c) showing the similar connection skeleton of the chain B in **1** and the  $\infty[\text{UPO}_4]$  chain in  $\text{CaU}(\text{PO}_4)_2$
